# Supplementary material for: Hybridization of Curcumin Analogues with Cinnamic Acid Derivatives as Multi-Target Agents Against Alzheimer’s Disease Targets
Source: PubMed Central journal article supplement (PMC7662280; doi:10.3390/molecules25214958), 2020-10-26
Supplement: molecules-25-04958-s001.pdf [file molecules-25-04958-s001.pdf]

Table S-I. Molecular properties predictors calculated by the MolSoft platform [52, 91].

| Comp. | TPSA (Å <sup>2</sup> ) <sup>a</sup> | Volume (Å <sup>3</sup> ) <sup>b</sup> | LogP       | LogS (in mg/L) | Number of HBA | Number of HBD | %ABS =109-(0.345 x TPSA) <sup>c</sup> | Drug-Likeness Model Score (DLS) | BBB Score |
|-------|-------------------------------------|---------------------------------------|------------|----------------|---------------|---------------|---------------------------------------|---------------------------------|-----------|
| 1a    | 24.31                               | 403.94                                | 5.80 (> 5) | 0.07           | 2             | 1             | 100.61                                | -1.36                           | 4.64      |
| 1b    | 26.89                               | 302.71                                | 2.68       | 238.66         | 4             | 1             | 99.72                                 | -0.72                           | 5.54      |
| 1c    | 44.60                               | 382.88                                | 3.87       | 17.56          | 2             | 3             | 93.1                                  | -1.64                           | 4.11      |
| 1d    | 44.42                               | 379.48                                | 3.48       | 61.76          | 2             | 3             | 93.8                                  | -1.42                           | 4.07      |
| 1e    | 39.31                               | 559.95                                | 7.80 (> 5) | 0.42           | 4             | 1             | 95.44                                 | -1.22                           | 3.93      |
| 1f    | 68.44                               | 271.94                                | 0.06       | 6010.37        | 4             | 3             | 85.39                                 | -0.69                           | 3.53      |
| 1g    | 24.86                               | 306.30                                | 3.48       | 53.22          | 2             | 1             | 100.42                                | -1.28                           | 5.57      |
| 1h    | 26.89                               | 336.64                                | 3.94       | 19.86          | 4             | 1             | 99.72                                 | -1.05                           | 5.53      |
| 1i    | 26.89                               | 350.95                                | 4.07       | 23.47          | 4             | 1             | 99.72                                 | -0.74                           | 5.55      |
| 1j    | 24.86                               | 318.13                                | 3.61       | 36.11          | 2             | 1             | 100.42                                | -1.34                           | 5.57      |
| 2a    | 28.62                               | 151.60                                | 2.22       | 522.96         | 2             | 1             | 99.13                                 | -1.17                           | 4.26      |
| 2b    | 28.35                               | 200.43                                | 3.19       | 68.87          | 2             | 1             | 99.22                                 | -1.34                           | 4.86      |
| 2c    | 61.72                               | 174.88                                | 1.27       | 3541.88        | 4             | 3             | 87.7                                  | -0.35                           | 2.80      |
| 3a    | 28.29                               | 550.36                                | 7.93 (> 5) | 0.13           | 2             | 0             | 99.24                                 | -0.75                           | 3.43      |
| 3b    | 28.56                               | 501.54                                | 6.57 (> 5) | 0.12           | 2             | 0             | 99.15                                 | -0.75                           | 3.81      |
| 3c    | 28.01                               | 599.18                                | 8.89 (> 5) | 0.10           | 2             | 0             | 99.34                                 | -0.79                           | 3.27      |
| 3d    | 28.83                               | 464.54                                | 5.74 (> 5) | 0.60           | 2             | 0             | 99.05                                 | -0.56                           | 4.40      |
| 3e    | 30.59                               | 497.95                                | 5.77 (> 5) | 0.23           | 4             | 0             | 98.45                                 | -0.55                           | 3.87      |
| 3f    | 28.56                               | 513.37                                | 6.70 (> 5) | 0.12           | 2             | 0             | 99.15                                 | -0.35                           | 3.72      |
| 3g    | 28.83                               | 452.72                                | 5.61 (> 5) | 0.62           | 2             | 0             | 99.05                                 | -0.76                           | 4.49      |
| 3h    | 61.38                               | 573.63                                | 6.97 (> 5) | 0.18           | 4             | 2             | 87.82                                 | 0.08                            | 2.45      |
| 1k    | 12.86                               | 394.39                                | 6.86 (> 5) | 0.03           | 1             | 0             | 104.56                                | -0.90                           | 3.98      |
| 1l    | 21.94                               | 299.34                                | 3.91       | 14.25          | 2             | 0             | 101.43                                | -1.31                           | 5.17      |
| 1m    | 21.40                               | 396.98                                | 6.23 (> 5) | 0.05           | 2             | 0             | 101.62                                | -1.39                           | 4.10      |
| 1n    | 12.49                               | 413.39                                | 7.22 (> 5) | 0.04           | 2             | 0             | 104.69                                | -1.36                           | 4.22      |

|                        |       |        |            |        |   |   |        |       |      |
|------------------------|-------|--------|------------|--------|---|---|--------|-------|------|
| <b>1o</b>              | 11.71 | 313.93 | 4.18       | 11.10  | 2 | 1 | 104.96 | -1.38 | 5.74 |
| <b>1p</b>              | 11.17 | 411.57 | 6.50 (>5)  | 0.03   | 2 | 1 | 105.15 | -1.47 | 4.81 |
| <b>1q</b>              | 39.78 | 372.71 | 5.24 (> 5) | 0.22   | 4 | 1 | 95.8   | -1.23 | 4.12 |
| <b>Curcumin (Keto)</b> | 73.83 | 393.60 | 2.83       | 428.21 | 6 | 2 | 83.53  | -0.82 | 2.83 |
| <b>Curcumin (Enol)</b> | 77.11 | 401.76 | 3.29       | 380.63 | 6 | 3 | 82.4   | -0.61 | 2.78 |

<sup>a</sup>Topological polar surface area, <sup>b</sup>Molecular volume, <sup>c</sup>Percentage absorption

**Number of HBA:**Number of hydrogen bond acceptors (n-ON)

**Number of HBD:**Number of hydrogen bond donors (n-OH/NH)

Data were calculated by the **MolSoftplatform** (<http://molsoft.com/mprop/>). The percentage of absorption (%ABS) was calculated by using  $\%ABS = 109 - (0,345 \times TPSA)$  and is referred to the degree of absorption.

All molecular property predictors are calculated using fragment-based contributions.

**LogP (octanol/water partition coefficient)**

**LogS (water solubility)**

**Molecular Polar Surface Area (PSA) and Volume**

PSA is defined as sum of surfaces of oxygens, nitrogens and attached hydrogens.
